# Supplementary material for: Strategies to Enhance Retention in a Cohort Study Among Adults of Turkish Descent Living in Berlin
Source: Springer Nature journal article supplement (doi:10.1007/s10903-021-01309-1), 2021-11-19

**Supplementary figure S1** Flowchart – Recruitment process

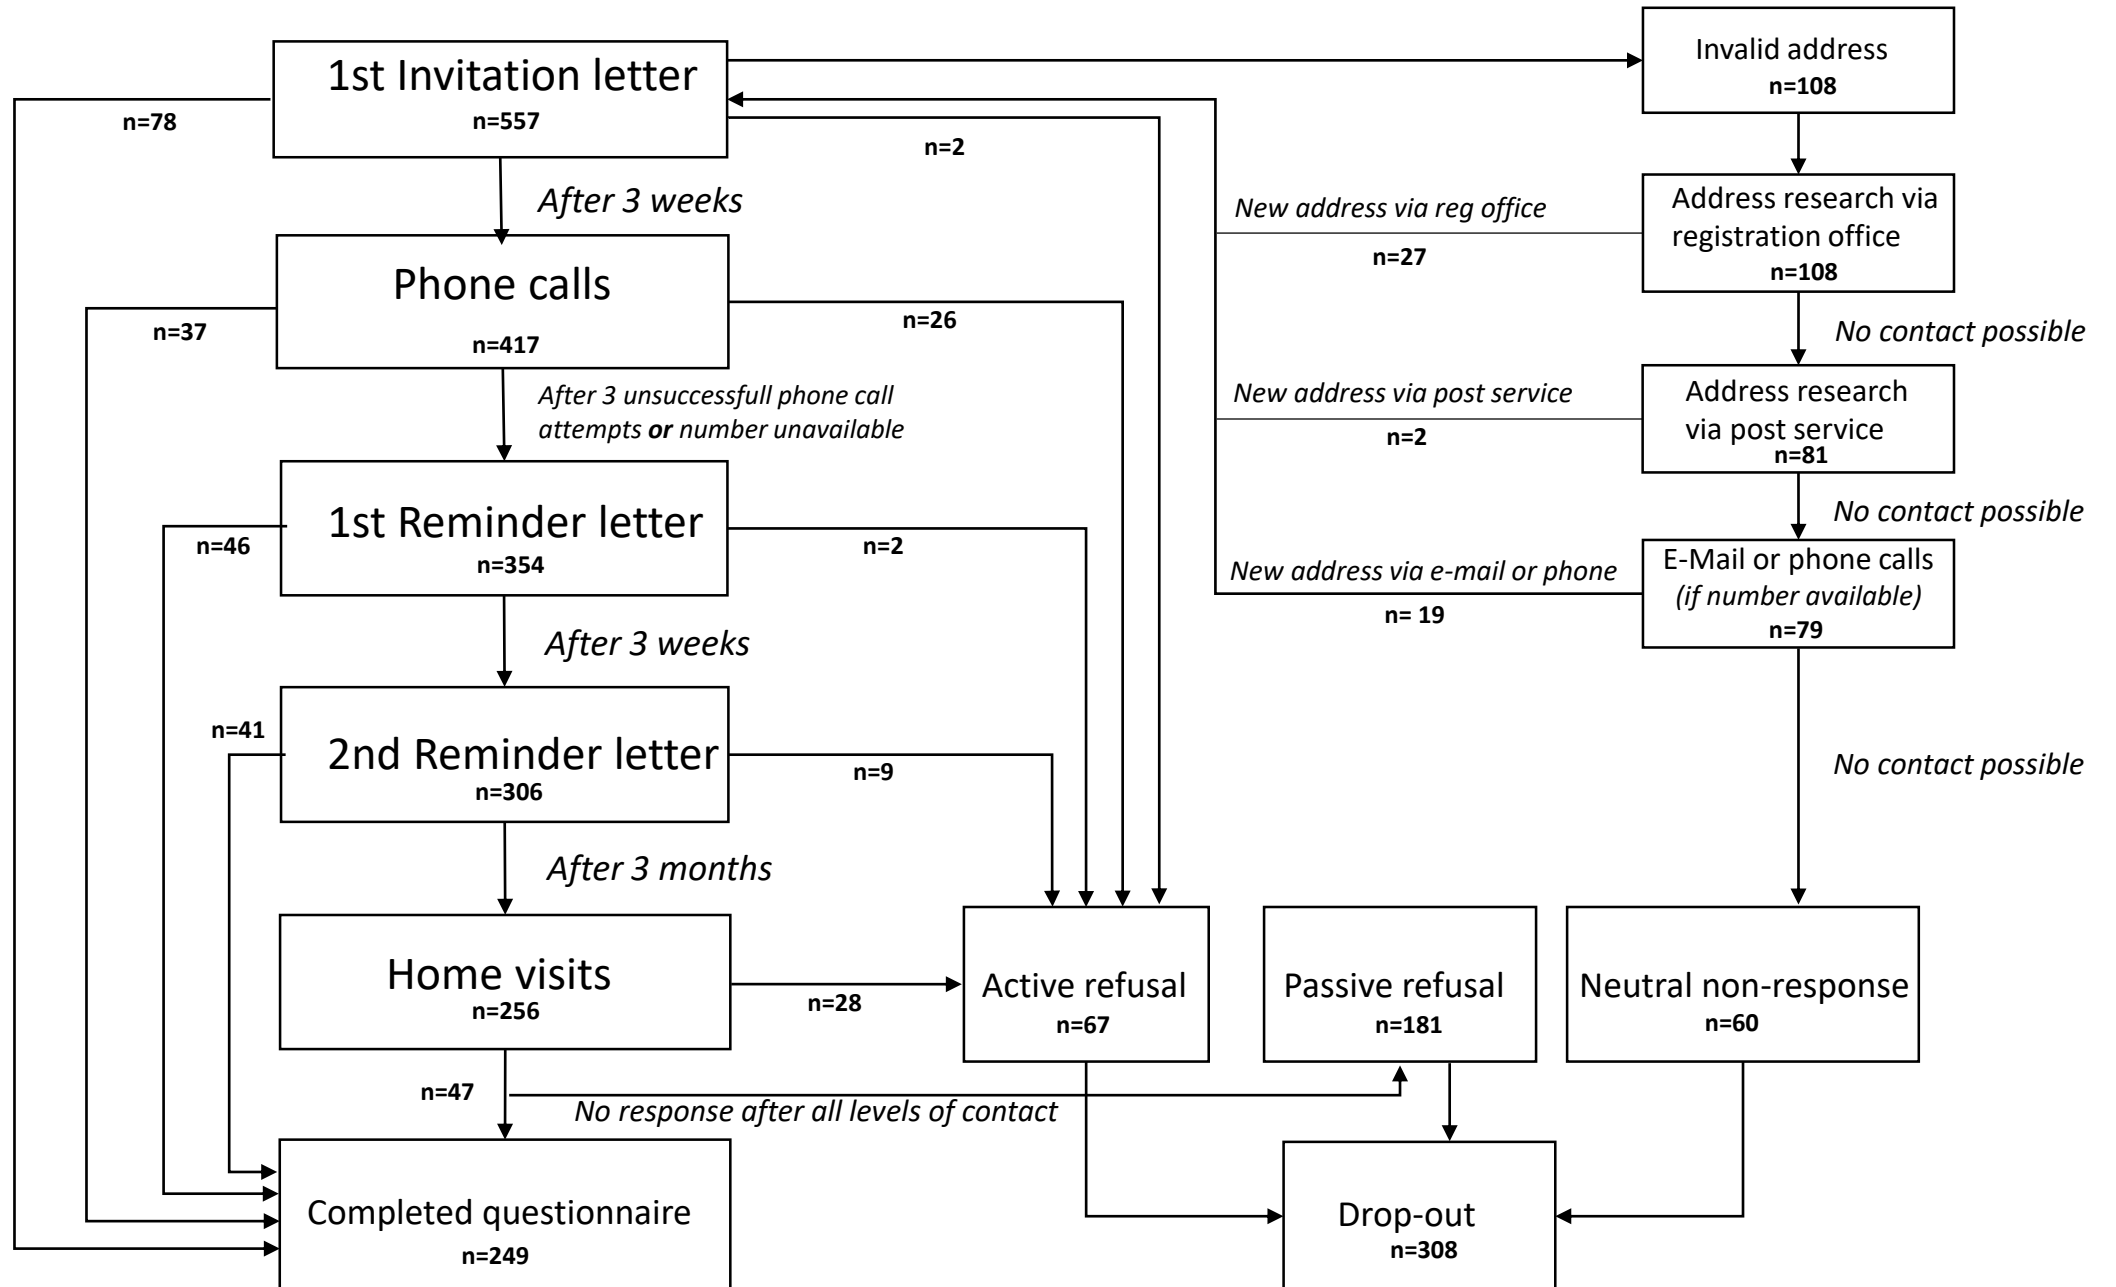

Supplement: MOESM1 [file 19884240]
